# Supplementary material for: Changes in AXL and/or MITF melanoma subpopulations in patients receiving immunotherapy
Source: PubMed Central journal article supplement (PMC11652950; doi:10.1016/j.iotech.2024.101009), 2024-11-15

# Supplementary Figure S4

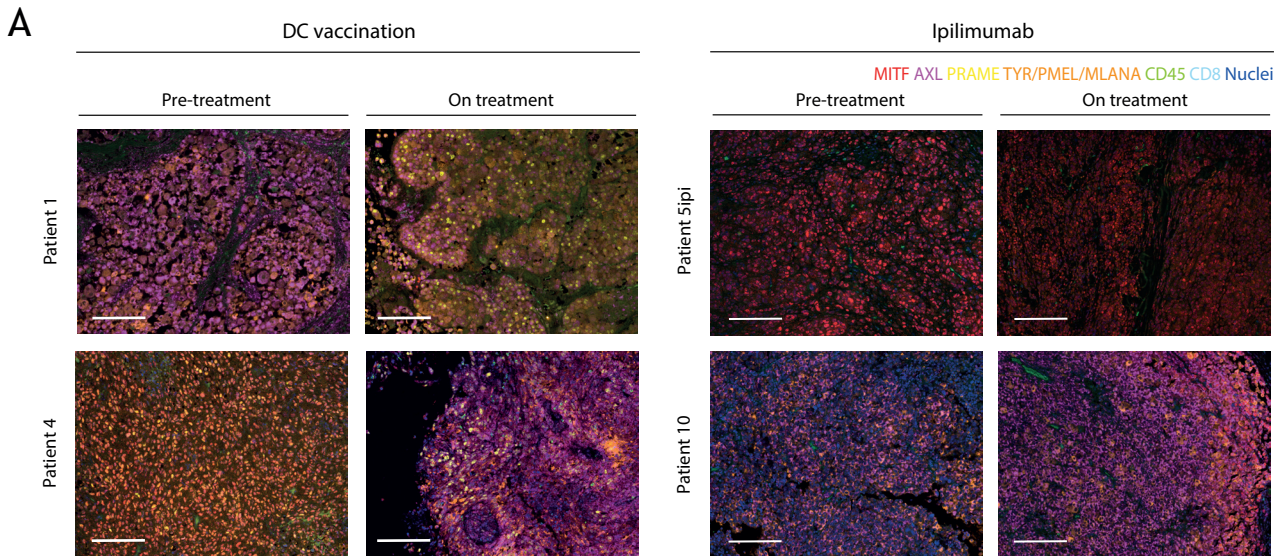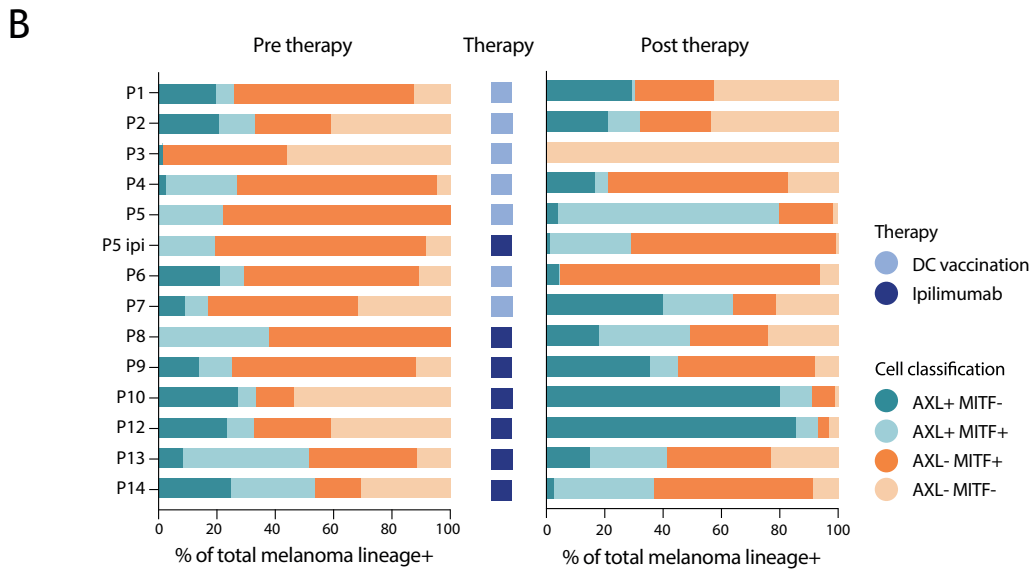

Supplement: mmc4.pdf [file mmc4.pdf]
