# Supplementary material for: Changes in AXL and/or MITF melanoma subpopulations in patients receiving immunotherapy
Source: PubMed Central journal article supplement (PMC11652950; doi:10.1016/j.iotech.2024.101009), 2024-11-15
Supplement: mmc5.pdf [file mmc5.pdf]

# Supplementary Figure S5

## DC vaccination

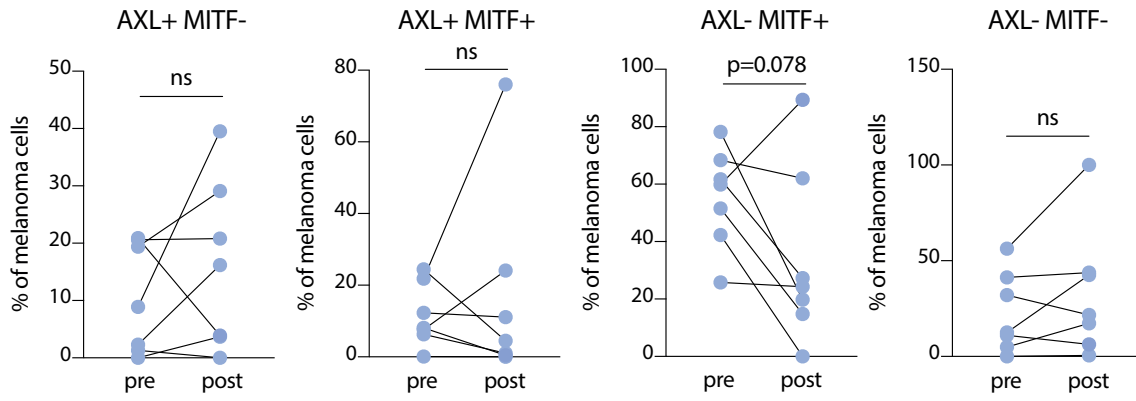

## Ipilimumab

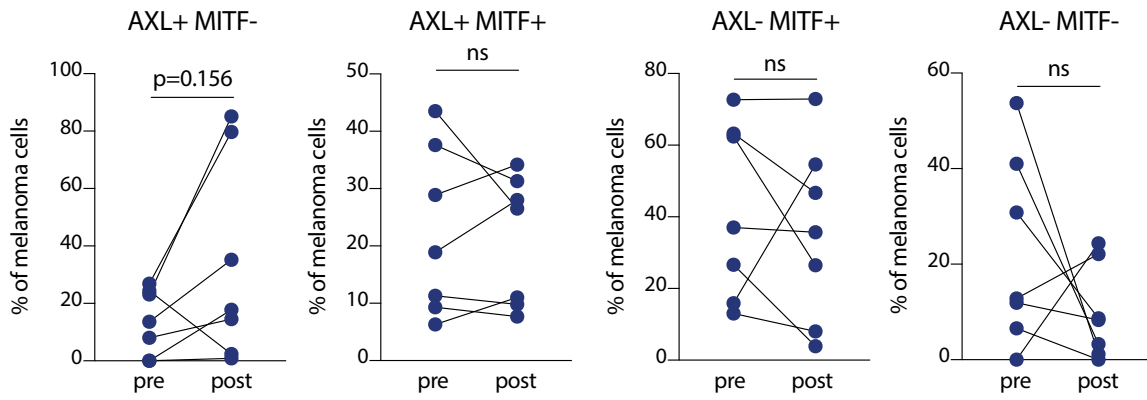

Therapy

- DC vaccination
- Ipilimumab
